# Supplementary material for: Use of Artificial Neural Networks and NIR Spectroscopy for Non-Destructive Grape Texture Prediction
Source: MDPI journal article supplement (doi:10.3390/foods11030281), 2022-01-20
Supplement: s1 [file s1]

## Supplementary material

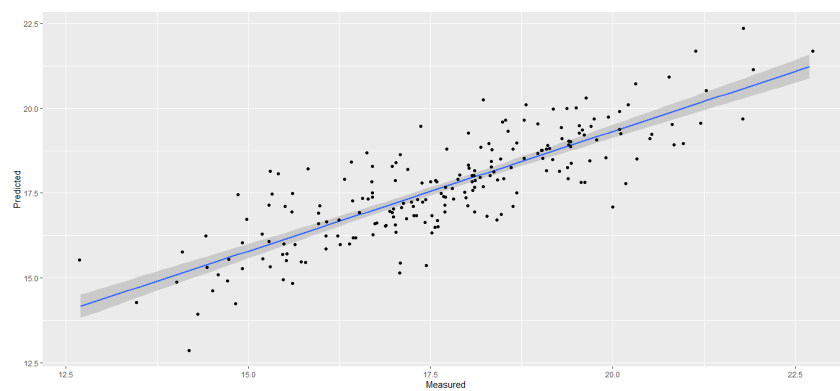

**Figure S1.** PLS model for TSS on the training stusing the full spectral range

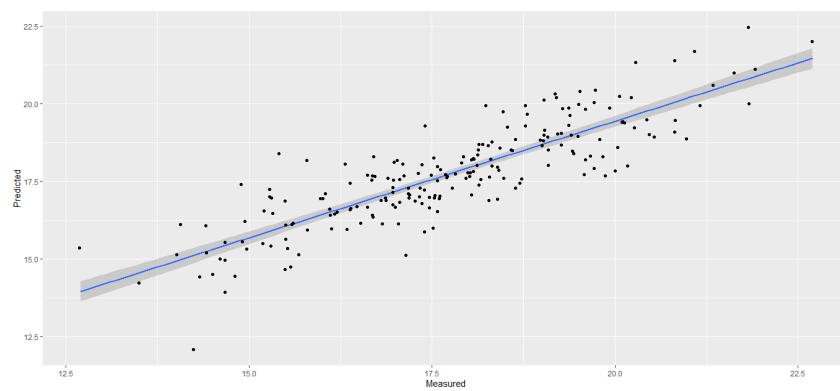

**Figure S2.** PLS model for TSS on the training set using the selected wave numbers

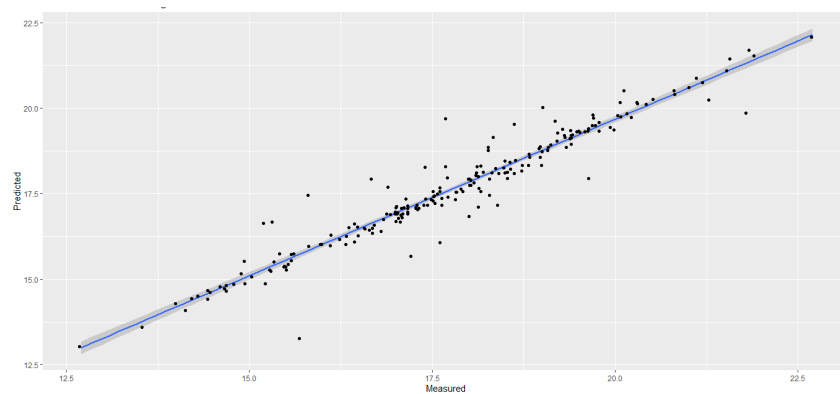

**Figure S3.** ANN model for TSS on the training set

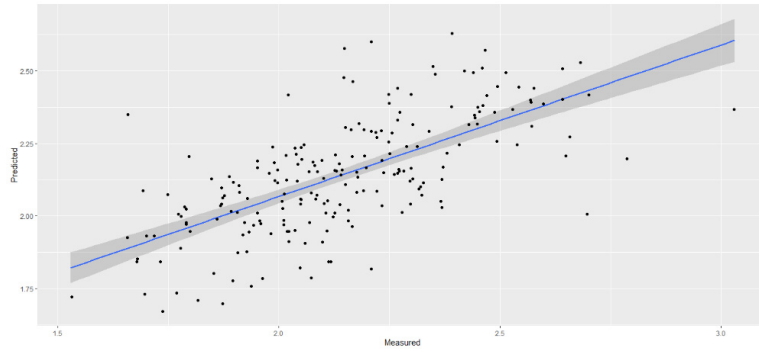

**Figure S4.** PLS model for BS on the training set using the full spectral range

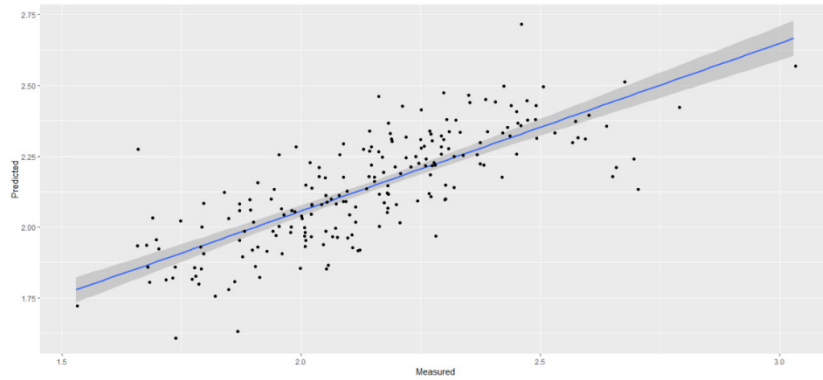

**Figure S5.** PLS model for BS on the training set using the selected wave numbers

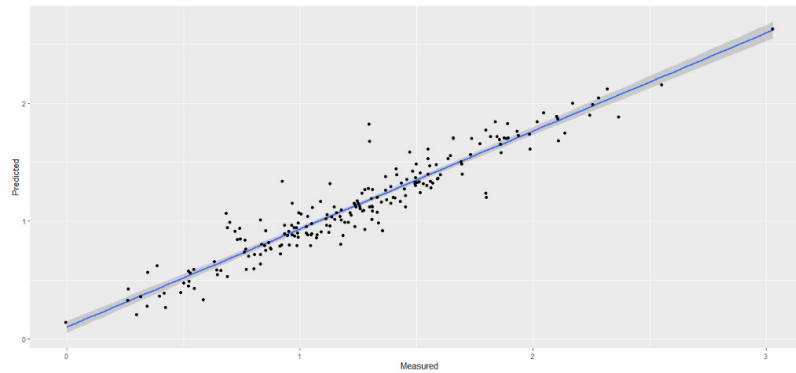

**Figure S6.** ANN model for BS on the training set using the selected wave numbers

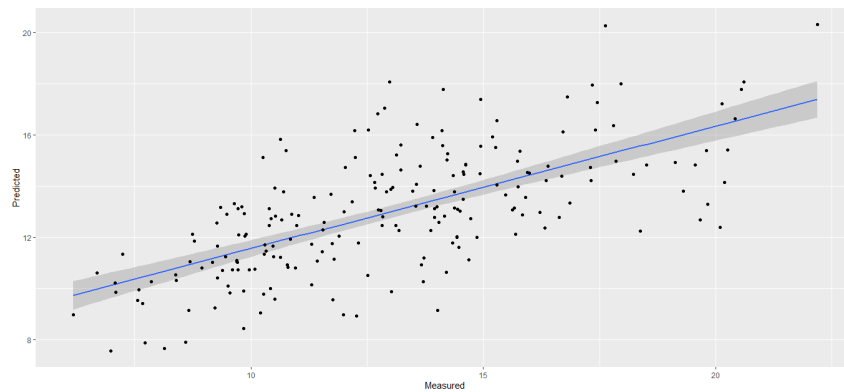

**Figure S7.** PLS model for BH on the training set using the full spectral range

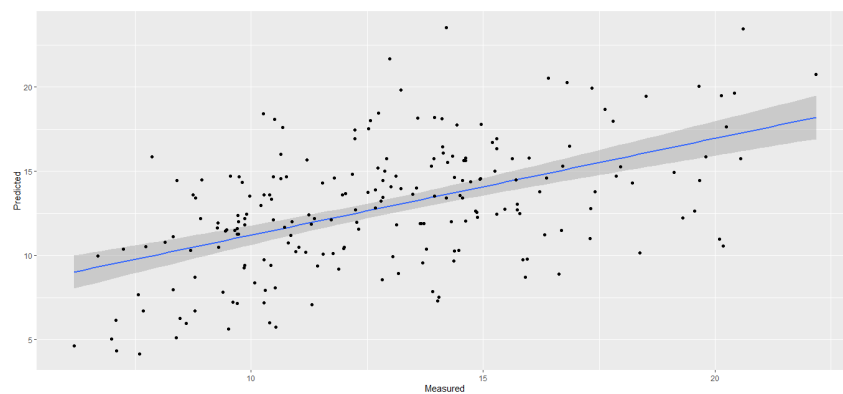

**Figure S8.** PLS model for BH on the training set using the selected wave numbers

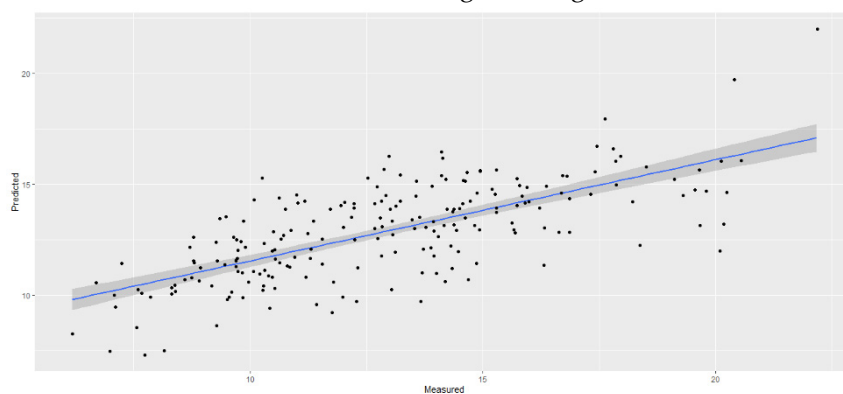

**Figure S9.** ANN model for BH on the training set using the selected wave numbers

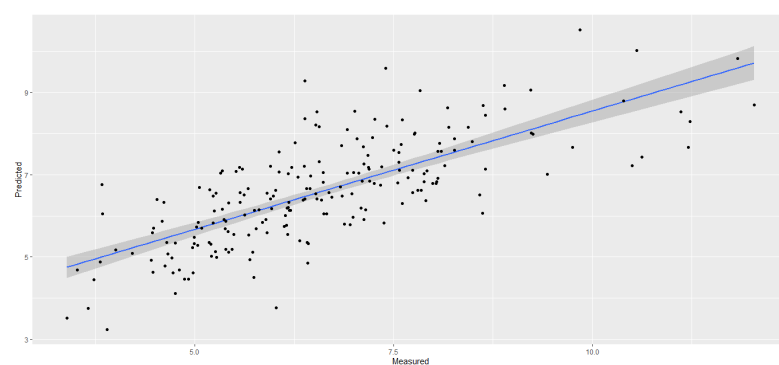

**Figure S10.** PLS model for BCh on the training set using the full spectral range

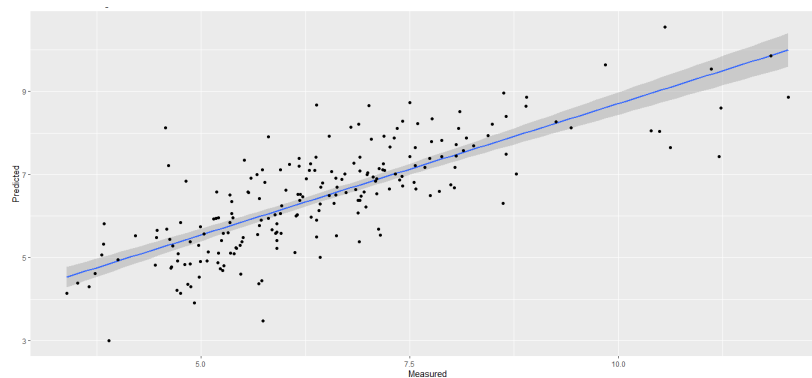

**Figure S11.** PLS model for BCh on the training set using the selected wave numbers

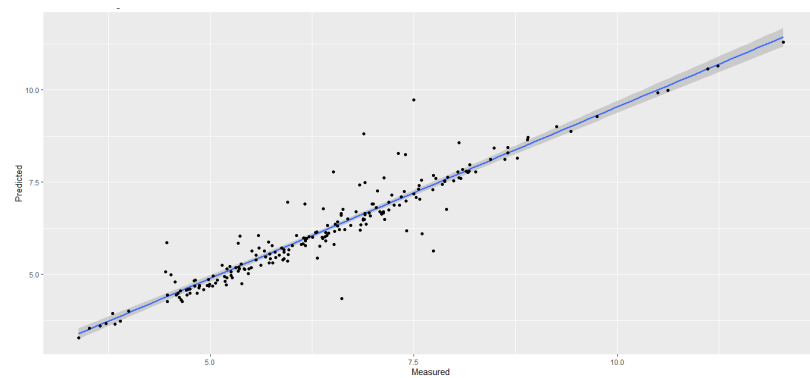

**Figure S12.** ANN model for BCh on the training set using the selected wave numbers
